# Supplementary material
Source: PubMed Central journal article supplement (PMC3732525)

Figure S1

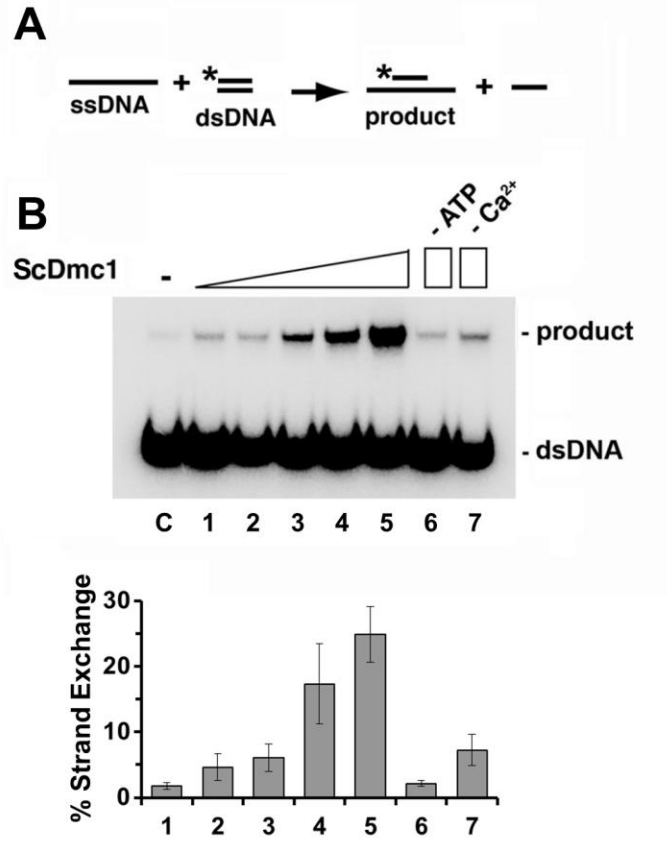

Supplement: NIHMS485514-supplement-01.pdf [file NIHMS485514-supplement-01.pdf]

Figure S2

A

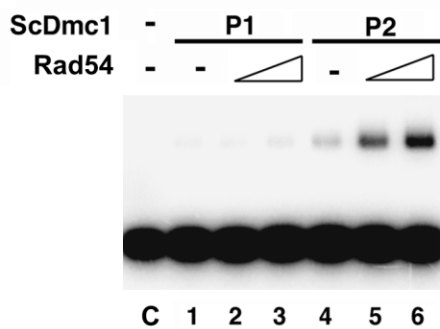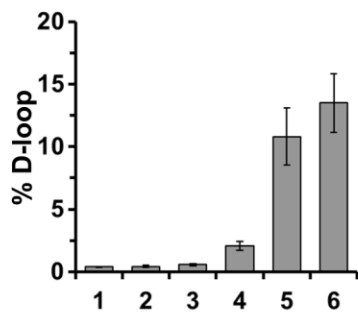

B

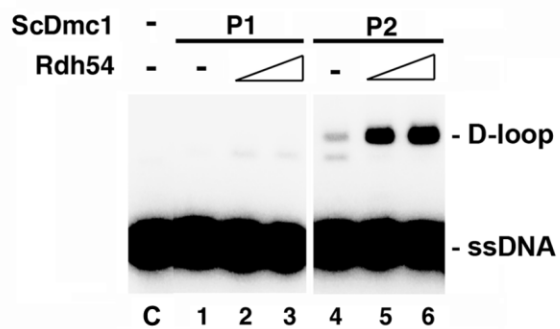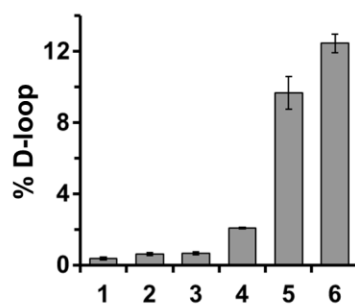

Supplement: NIHMS485514-supplement-02.pdf [file NIHMS485514-supplement-02.pdf]

**Figure S3**

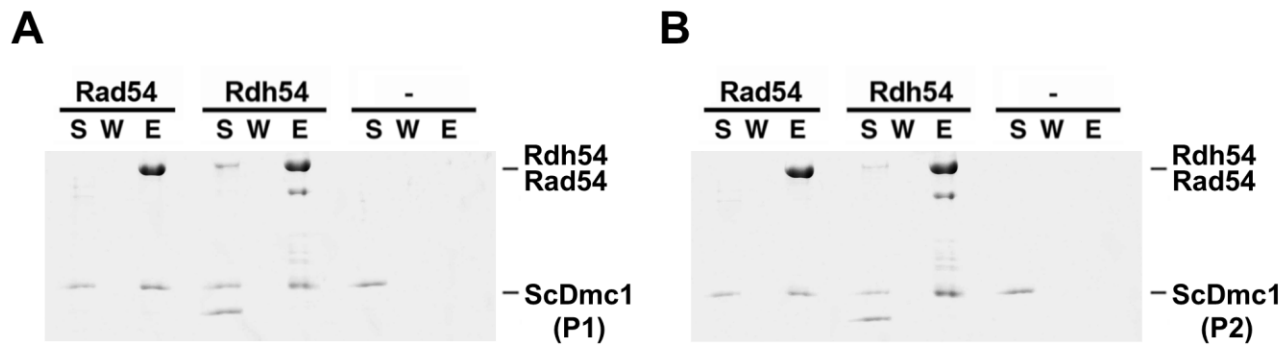

Supplement: NIHMS485514-supplement-03.pdf [file NIHMS485514-supplement-03.pdf]
